# Supplementary material for: Glutathione disrupts galectin-10 Charcot-Leyden crystal formation to possibly ameliorate eosinophil-based diseases such as asthma: Effects of glutathione on Charcot-Leyden crystals and Gal-10
Source: PubMed Central journal article supplement — Acta Biochim Biophys Sin (Shanghai). 2023 Mar 28;55(4):613–22. doi: 10.3724/abbs.2023050 (PMC10195141; doi:10.3724/abbs.2023050), 2023-03-28
Supplement: 22513Supplementary_Figures.pdf [file 22513Supplementary_Figures.pdf]

A

lactose binds to the ligand binding site of *M. fascicularis* Gal-10

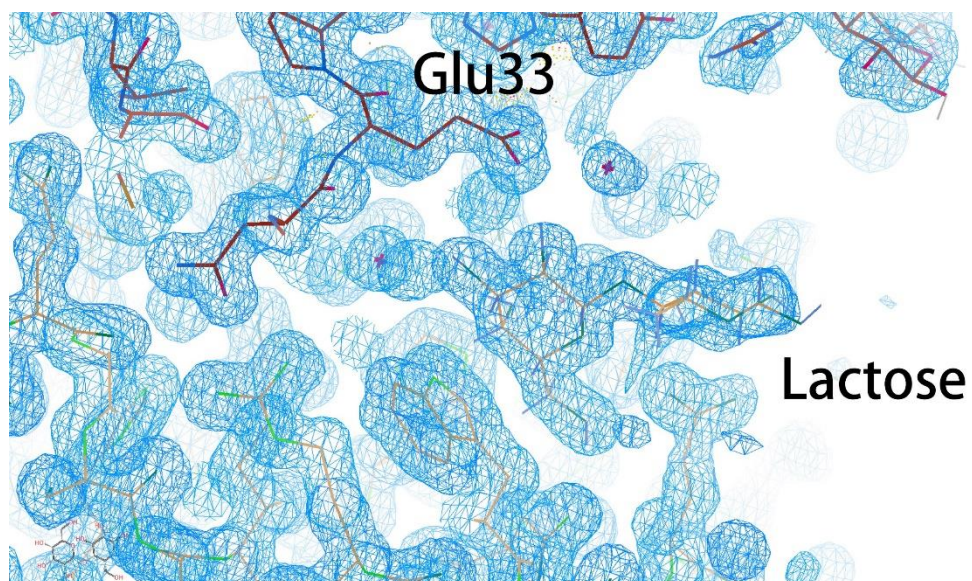

B

lactose binds to the ligand binding site of *M. mulatta* Gal-10

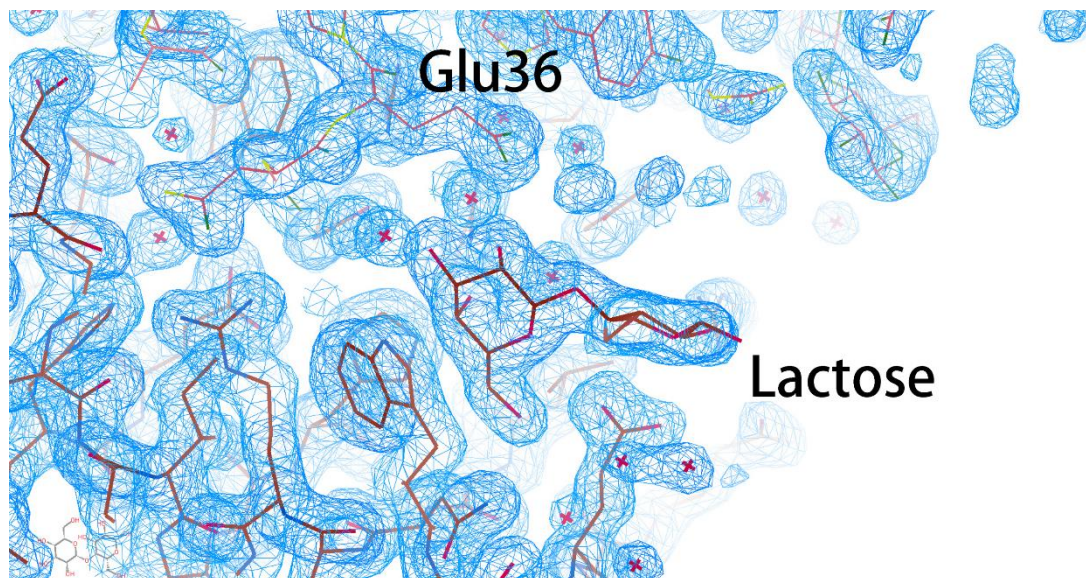

Supplementary Figure S1. The electron density for lactose molecules in the ligand binding sites of *M. fascicularis* Gal-10 and *M. mulatta* Gal-10 The  $2|F_o|-|F_c|$ ,  $\alpha c$  map contoured at  $1.0\sigma$  is shown in blue.
