# Supplementary material for: Glutathione disrupts galectin-10 Charcot-Leyden crystal formation to possibly ameliorate eosinophil-based diseases such as asthma: Effects of glutathione on Charcot-Leyden crystals and Gal-10
Source: PubMed Central journal article supplement — Acta Biochim Biophys Sin (Shanghai). 2023 Mar 28;55(4):613–22. doi: 10.3724/abbs.2023050 (PMC10195141; doi:10.3724/abbs.2023050), 2023-03-28
Supplement: 22513Supplementary_Table_S1.pdf [file 22513Supplementary_Table_S1.pdf]

**Supplementary Table S1. Data collection and refinement statistics**

| PDB code                                                                  | 7XXU                                           | 7XXV                                           | 7XXW                                           | 7XXX                                           | 7XXY                                           | 7XXZ                                           | <u>human Gal-10</u><br><u>5XRH</u>                    |
|---------------------------------------------------------------------------|------------------------------------------------|------------------------------------------------|------------------------------------------------|------------------------------------------------|------------------------------------------------|------------------------------------------------|-------------------------------------------------------|
| Resolution (Å)                                                            | 19.99-1.80 (1.84-1.80)                         | 19.97-1.60 (1.63-1.60)                         | 19.96-1.63 (1.66-1.63)                         | 19.99-1.94 (1.99-1.94)                         | 19.47-1.92 (1.97-1.92Å)                        | 19.54-1.83 (1.87-1.83)                         | <u>19.50-1.55 (1.58-1.55)</u>                         |
| Space group                                                               | P6 <sub>5</sub> 22                             | <u>P6<sub>5</sub>22</u>                               |
| Unit cell parameters (a, b, c) (Å), ( $\alpha$ , $\beta$ , $\gamma$ ) (°) | (48.53, 48.53, 258.91), (90.00, 90.00, 120.00) | (48.53, 48.53, 258.57), (90.00, 90.00, 120.00) | (48.86, 48.86, 259.47), (90.00, 90.00, 120.00) | (48.59, 48.59, 258.91), (90.00, 90.00, 120.00) | (48.60, 48.62, 256.27), (90.00, 90.00, 119.99) | (48.72, 48.72, 259.20), (90.00, 90.00, 120.00) | <u>(48.56, 48.56, 260.33), (90.00, 90.00, 120.00)</u> |
| No. of measured reflections                                               | 289574 (17117)                                 | 4266594 (7893)                                 | 429428 (18387)                                 | 261243 (18307)                                 | 264291 (17271)                                 | 157494 (9846)                                  | <u>489727 (17756)</u>                                 |
| No. of unique reflections                                                 | 17996 (1029)                                   | 24980 (1152)                                   | 24277 (1145)                                   | 14536 (962)                                    | 14830 (941)                                    | 17232 (1034)                                   | <u>27731 (1288)</u>                                   |
| Completeness (%)                                                          | 99.9 (100.0)                                   | 99.7 (95.7)                                    | 99.9 (100.0)                                   | 99.9 (100.0)                                   | 99.9 (100.0)                                   | 99.6 (99.8)                                    | <u>99.7 (96.9)</u>                                    |
| Multiplicity                                                              | 16.1 (16.6)                                    | 17.1 (6.9)                                     | 17.7 (16.1)                                    | 18.0 (19.0)                                    | 17.8 (18.4)                                    | 9.1 (9.5)                                      | <u>17.7 (13.8)</u>                                    |
| $R_{\text{merge}}$ (%)                                                    | 9.3 (37.9)                                     | 6.8 (76.8)                                     | 6.5 (46.9)                                     | 9.5 (57.8)                                     | 10.3 (74.1)                                    | 10.0 (65.0)                                    | <u>8.0 (45.3)</u>                                     |
| $\langle I/\delta(I) \rangle$                                             | 20.1 (6.1)                                     | 26.5 (2.6)                                     | 26.5 (5.0)                                     | 22.6 (5.5)                                     | 21.1 (4.6)                                     | 14.0 (3.0)                                     | <u>24.3 (6.7)</u>                                     |
| $R_{\text{model}}$ (%)                                                    | 18.43                                          | 17.57                                          | 17.71                                          | 17.60                                          | 17.39                                          | 17.70                                          | <u>17.15</u>                                          |

|                                                                    |               |                   |                   |                |                   |                   |                      |
|--------------------------------------------------------------------|---------------|-------------------|-------------------|----------------|-------------------|-------------------|----------------------|
| $R_{\text{free}}$ (%)                                              | 21.72         | 19.29             | 20.54             | 21.21          | 20.90             | 20.77             | <u>19.57</u>         |
| Rmsd bond lengths (Å)                                              | 0.006         | 0.006             | 0.005             | 0.006          | 0.006             | 0.006             | <u>0.006</u>         |
| Rmsd bond angles (°)                                               | 0.853         | 0.92              | 0.853             | 0.886          | 0.934             | 0.908             | <u>0.905</u>         |
| Number of atoms                                                    |               |                   |                   |                |                   |                   |                      |
| Protein                                                            | 1129          | 1129              | 1129              | 1132           | 1132              | 1132              | <u>1123</u>          |
| Ligand                                                             | -             | 45                | 6                 | -              | 23                | 6                 | =                    |
| Water                                                              | 189           | 171               | 166               | 190            | 31                | 204               | <u>188</u>           |
| Average B factors (Å <sup>2</sup> )<br>(protein/ligand/solvent)    | 18.97/-/30.45 | 16.85/24.16/29.42 | 19.57/32.55/30.80 | 21.632/-/33.06 | 24.47/33.92/34.18 | 19.08/30.38/31.03 | <u>16.71/-/29/64</u> |
| Ramachandran plot <sup>f</sup> residues in<br>favored regions (%)  | 97.78         | 97.78             | 97.78             | 97.06          | 97.79             | 97.79             | <u>97.90</u>         |
| Ramachandran plot <sup>f</sup> residues in<br>allowed regions (%)  | 1.48          | 1.48              | 1.48              | 2.21           | 1.47              | 1.47              | <u>1.4</u>           |
| Ramachandran plot <sup>f</sup> residues in<br>outliers regions (%) | 0.74          | 0.74              | 0.74              | 0.74           | 0.74              | 0.74              | <u>0.7</u>           |
| Substrate/Ligand                                                   | -             | Lactose           | Glycerol          | -              | Lactose           | Glycerol          | =                    |
