# Supplementary material for: Glutathione disrupts galectin-10 Charcot-Leyden crystal formation to possibly ameliorate eosinophil-based diseases such as asthma: Effects of glutathione on Charcot-Leyden crystals and Gal-10
Source: PubMed Central journal article supplement — Acta Biochim Biophys Sin (Shanghai). 2023 Mar 28;55(4):613–22. doi: 10.3724/abbs.2023050 (PMC10195141; doi:10.3724/abbs.2023050), 2023-03-28
Supplement: 22513Tables.pdf [file 22513Tables.pdf]

**Table 1. CLC dissolution assay**

|                                   | 3.125 mM (A/B/C) | 6.25 mM (A/B/C) | 12.5 mM (A/B/C) | 25 mM (A/B/C) | 50 mM (A/B/C) |
|-----------------------------------|------------------|-----------------|-----------------|---------------|---------------|
| Gal-10                            | (*/*/*)          | (*/*/*)         | (92s/56s/35s)   | (64s/32s/12s) | (22s/22s/10s) |
| G10-C-29a                         | (*/*/*)          | (*/*/*)         | (18s/136s/*)    | (16s/96s/75s) | (6s/64s/47s)  |
| G10-C-57a                         | (*/*/*)          | (*/*/*)         | (*/*/*)         | (*/*/*)       | (*/*/*)       |
| <i>Macaca fascicularis</i> Gal-10 | (*/-/-)          | (*/-/-)         | (*/-/-)         | (*/-/-)       | (*/-/-)       |
| <i>Macaca mulatta</i> Gal-10      | (*/-/-)          | (*/-/-)         | (*/-/-)         | (*/-/-)       | (*/-/-)       |

A = Reduced glutathione, B = Oxidized glutathione, C = NaOH.

“\*” means the compounds could not dissolve the proteins within six hours.

“-” means the effects were not determined.

**Table 2. Inhibition of Gal-10 crystallization assay**

|                                   | The lowest concentration of glutathione that can inhibit protein crystallization |
|-----------------------------------|----------------------------------------------------------------------------------|
| Galectin-10                       | 3 mM                                                                             |
| G10-C-29a                         | 3 mM                                                                             |
| G10-C-57a                         | *                                                                                |
| <i>Macaca fascicularis</i> Gal-10 | *                                                                                |
| <i>Macaca mulatta</i> Gal-10      | *                                                                                |

“\*” means 50 mM GSH could not inhibit human Gal-10 C57A, monkey Gal-10 M1 and M2 crystallization.
